# Supplementary material for: A Lytic Polysaccharide Monooxygenase with Broad Xyloglucan Specificity from the Brown-Rot Fungus Gloeophyllum trabeum and Its Action on Cellulose-Xyloglucan Complexes
Source: PubMed Central journal article supplement (PMC5086550; doi:10.1128/aem.01768-16), 2016-10-27
Supplement: AEM.01768-16_zam022167501so1.pdf [file AEM.01768-16_zam022167501so1.pdf]

1 Characterization of an LPMO from the brown-rot fungus *Gloeophyllum*  
2 *trabeum* with broad xyloglucan specificity, and its action on cellulose-  
3 xyloglucan complexes – Supplemental material

4  
5 **Authors:** Yuka Kojima<sup>1,\*</sup>, Anikó Várnai<sup>2,\*</sup>, Takuya Ishida<sup>3</sup>, Naoki Sunagawa<sup>3</sup>, Dejan M. Petrovic<sup>2</sup>,  
6 Kiyohiko Igarashi<sup>3,4</sup>, Jody Jellison<sup>5</sup>, Barry Goodell<sup>6</sup>, Gry Alfredsen<sup>7</sup>, Bjørge Westereng<sup>2</sup>, Vincent  
7 G.H. Eijsink<sup>2,#</sup>, Makoto Yoshida<sup>1,#</sup>

8

9 **Running title** (max. 56 char): Enzymatic properties of a brown-rot LPMO

10

11 *Section 1. Alternative splicing of the gene encoding GtLPMO9A (Fig.*  
12 *S1).*

13

```
ATGTTCCGTGCCCAATCCTTCCTACCCGTCCTTGCTTTGGTTCTGCGGGTCGCTGCCCATGGATATGTTG
ATCAAGTCACGATAGGCGGACAAGTTTACACCGGATATCAGCCCTACCAGGACCCATACGAAAGCCCCGT
CCCCAGCGTATTGAGAGAGCTATTCCAGGAAATGGGCCCGTCGAAGATCTCACACTCCTTGAGTGAGTG
AGTTGTTCAATGGGTACCTGAAGAGACGTACTGACTGTCACTCGCCGTGAAAGCATCCAATGTAATGGCT
CAGGGGGCTCCGGTACGAAGCCCGCCGCTCTCATAGCTTCAGCAGCCGCTGGGGATGAGATTGCCTTCCA
CTGGACTACATGGCCCAGTTCGCATGTCGTAAGTCACAAACGCTACGCAACTCATATAGCTCCCCATAAT
TTACCGCCAACAGGGCCCAGTCATTACTTACATGGGGAAAGTGCCTAGCAACACCGATATCACCAGCTAT
TCCCCACTGGCTCCGACGTCATTTGGTTCAAGATTGACGAAGCAGGTTACGAGAACGGCAAGTGGGCCG
CTACGGATATCATGTCGGCACAGAATAGCACTTGGACTGTGACCATAACCGAAGGCGCTCGCTCCGGGACA
GTACATTGTCCGTCATGAAATGTGAGAGATCGAAGGTTTTGCTGTATCGACCGGACCACTCAGCTCCATC
TTAAGAATCGCCCTGCACCAAGCTGAGACCTATCCCGGTGCTCAGTTTTACCCTGACTGCTTCCAAGTCC
AAGTCACCGGCCCTGGTACGGAGACCCACATCTCAGGCTCTCGTGTCTTCCAGGGCGGTATACTCC
CACCCTCCCGGCATCACCTTCAACGTCATATAGCGGTAAGCACAGAGGTGACGTCATTAGACAAATCCTA
ACACAAATAAATTCATAGGTAGTATTACTTTCATACCCCATCCCCGGTCCGCTGTCTGGACGAGCAATGA
GGCTTTCTCCGGCGGGTCTTCTCATCTGCTGCAGCCAGCAGCACGGCAGTCGCCTCTTCGACCGCTGAC
TCCTCATCTCTGCGGCCGCCACCCAGTCTCTCCCGCCGCGCTTCGGGCTCCGCAGCACCTCTAGCT
CTGCTATAGGTACGAGCACGGCTAGCTCCGCTGCCGCTAGCGGGACCGCCATCGTCGACGCGAACACCTG
CATGAACAGTGCGTAGTGTCTTCTACGCGTTATAAGGCACTTTACTGATTTTGGCGGCCTTTCAGATTA
CAACAAGTGCATCGACGCCGGCCAGCCGACCCTGACTGGAGCGGCTGCACCGCGACTAAAGATGCCTGC
CTGGCTGGCGCGACGTACCAGCGACTTGCTCGTTCTGGTACCCTGGGACGTCTCTCTTTCTAA
```

14

15 **Figure S1. Splicing variants of the gene encoding GtLPMO9A.** Black colored regions indicate  
16 exons. Red colored regions indicate introns. The green colored region is an exon in the splicing  
17 variant that encodes GtLPMO9A-1 but an intron in the splicing variant that encodes GtLPMO9A-  
18 2. The stop codons for GtLPMO9A-1 (TAG) and GtLPMO9A-2 (TAA) are boxed.

19

20 *Section 2. Sequence analysis of the C-terminal domains of*  
21 *GtLPMO9A-2 and GtLPMO9D (Figs. S2-S4 + additional text).*

22

23 Fig. S2 shows the sequence of the C-terminal extensions of *GtLPMO9A-2* and *GtLPMO9D*. These  
24 start with a region of low sequence complexity, followed by a domain of unknown function.  
25 BLAST searches with the C-terminus of *GtLPMO9A-2* domain revealed similarities with domains  
26 found in a few LPMOs and two GH131s (broad specificity exo- $\beta$ -1,3/1,6-glucanases with endo- $\beta$ -  
27 1,4-glucanase activity), all being uncharacterized proteins with predicted domains. A multiple  
28 sequence alignment (Fig. S3) revealed conspicuous features, namely four conserved Cys  
29 residues (Cys304, 311, 324, and 331) and three conserved aromatic residues (Tyr308, Trp321,  
30 Tyr337), which are features characteristic of CBM1s, i.e. small fungal, cellulose-specific  
31 carbohydrate-binding modules. The unknown domain ends with a short, positively charged  
32 motif containing 3-5 arginine/lysine (Fig.S3), which is atypical for CBM1s.

33

34 BLAST searches with the C-terminal domain of *GtLPMO9D* revealed similarity with the C-  
35 terminal regions of a few basidiomycete LPMOs only (Fig. S4). This domain seems to consist of  
36 two positively charged, short sequences that are connected by 5 to 20 hydrophobic amino acids  
37 (Fig. S4). The first positively charged motif contains 3-5 lysines/arginines while the second motif  
38 contains 4-6 arginines/lysines with a conserved P+H $\Phi$ SR $\Phi$ M++ motif (where + is R or K, and  $\Phi$  is  
39 a hydrophobic amino acid), which is likely to be an  $\alpha$ -helix with a positive patch on one side.

40

41 Interestingly, none of the few LPMOs that have been characterized so far (or any cellulases and  
42 hemicellulases) carry a C-terminal domain with sequence homologous to that of *GtLPMO9A-2*  
43 or 9D. LPMO9s characterized so far carry 1) no CBM (some of the *N. crassa* LPMOs, *M.*  
44 *thermophila* LPMO9A, *T. terrestris* LPMO9E, *P. chrysosporium* LPMO9D), 2) the cellulose-binding  
45 CBM1 domain (e.g. some of the *N. crassa* and *P. anserina* LPMOs), or 3) an unknown C-terminal  
46 region (so far only *A. niger* LPMO AN3046; Jagadeeswaran et al. (1)).

47

48

*GtLPMO9A-2* 234 EAFSGGSSSSAAASSTAVASSTADSSSSAAATQSSSAAASGSAAPSSSAIGTSTASSAAA  
294 **SGTAIVDANTCMNNYNKCIDAGQDPDWSGCTATKDAFLAGATYQRLARSGTLGRLSF**

*GtLPMO9D* 223 VSGDSGTVDGQGGSTSSAILSGGAAPTGTASGSTPAGTSQPSSTTGTGNAGAN**PSSGKCS**  
283 **LKSRAAPTTSGNLSANYPRHFSRVMKRLLNDFQTTAHQW**

49

50 **Figure S2. Sequences of the C-terminal extensions of *GtLPMO9A-2* and *GtLPMO9D*.** The C-  
51 terminal regions that were analyzed further by sequence alignment (see Figs. S3 & S4) are  
52 printed in bold and underlined.

53

| <b>ID</b>         |                                                                                                        |  |             |
|-------------------|--------------------------------------------------------------------------------------------------------|--|-------------|
| M7WKQ1            | SQYTD-YTSCMRA-----                                                                                     |  | YNKCLDAHQP  |
| A0A061BI40        | SQYTD-YTSCMRA-----                                                                                     |  | YNKCLDAHQP  |
| G0SWB0            | SQYTD-YNSCMRA-----                                                                                     |  | YNKCLDAHQP  |
| A0A0K3CDZ6        | SQYTD-YNSCMRA-----                                                                                     |  | YNKCLDAHQP  |
| A0A0D7AYH5        | -CAKDGYNCCMDA-----                                                                                     |  | YNACAAKANSA |
| A0A0D7BPW0        | AGLVD-CNTCMNS-----                                                                                     |  | FNQCISASQP  |
| <b>GtLPMO9A-2</b> | TAIVD-ANTCMNN-----                                                                                     |  | YNKCIDAGQP  |
| A0A0D7AX18        | GGVQD-ANACMNT-----                                                                                     |  | YNKCIQTQP   |
| D8PQJ8            | TGIVD-ANACMNT-----                                                                                     |  | YNQCIAQSQP  |
| D8QGA8            | AATGD-ANVCMNE-----                                                                                     |  | YNQCIAKSQP  |
| A0A0D7BLY4        | SGQVD-ANVCMNS-----                                                                                     |  | YNKCIQSQP   |
| A0A0D7BKR1        | TGVVD-ANVCMND-----                                                                                     |  | YNKCIASQP   |
| D8PXB3            | KGIVD-ANCCMNGKFNIHLLVLLHCYMG <sup>RH</sup> FLPPE <sup>SL</sup> RSHP <sup>RN</sup> PA <sup>FC</sup> QSK |  | YNKCLAASQP  |
| R7RYA1            | TAIVN-ANTCM-----                                                                                       |  |             |
|                   | : . **                                                                                                 |  | : * * . : . |

| <b>ID</b>         |                                                                                                                |  | <b>% Identity</b> |
|-------------------|----------------------------------------------------------------------------------------------------------------|--|-------------------|
| M7WKQ1            | -KNGGAADFSACQSMN--CQS---YQ---RMARRSARHAARH--                                                                   |  | 37.0%             |
| A0A061BI40        | -KNGGAADFSACQSMN--CQS---YQ---RMARRSARHAARH--                                                                   |  | 37.0%             |
| G0SWB0            | -KNGGAADFSACQSMN--CQS---YQ---RMARRSARHAARH--                                                                   |  | 39.1%             |
| A0A0K3CDZ6        | -KNGGAADFSACQSMN--CQS---YQ---RMARRSARHAARH--                                                                   |  | 39.1%             |
| A0A0D7AYH5        | ANNGGNVDF SACSSAKDTCVAG-----LARRHARQWSRQL-                                                                     |  | 34.0%             |
| A0A0D7BPW0        | -----SPDWTGCGATKDTCMSTCKY-----GKRSPSR---                                                                       |  | 56.8%             |
| <b>GtLPMO9A-2</b> | -----DPDWSGCTATKDACLAGATYQ----RLARSGTLGRLS <sup>F</sup> -                                                      |  | 100.0%            |
| A0A0D7AX18        | -----NPDWTGCGATKDTCLSTAKY----MRRALKSGTLGRR <sup>L</sup> RA                                                     |  | 58.9%             |
| D8PQJ8            | -----NPDWTGCGATKDSCLATATYNVNMAARA <sup>KRDGK</sup> FGRL <sup>L</sup> L-                                        |  | 64.3%             |
| D8QGA8            | -----NPDWTGCGATRD <sup>T</sup> CLSTAR <sup>Y</sup> NTNMAARA <sup>KRDGK</sup> FGRL <sup>L</sup> L-              |  | 55.4%             |
| A0A0D7BLY4        | -----NPDWTGC <sup>E</sup> AT <sup>R</sup> TACLSNATYNFNMSQ <sup>RARRD</sup> GK <sup>F</sup> GR <sup>L</sup> L-- |  | 61.8%             |
| A0A0D7BKR1        | -----NPDWTGC <sup>E</sup> GT <sup>K</sup> AICMQNATYNFNMIN <sup>R</sup> L <sup>KRDGK</sup> FGRL <sup>L</sup> V- |  | 60.7%             |
| D8PXB3            | -----NPD <sup>F</sup> TGCSAA <sup>KD</sup> TCMTGAT <sup>Y</sup> DYNMAS <sup>RAKRDGK</sup> FGRL <sup>L</sup> L- |  | 58.9%             |
| R7RYA1            | -----SGCGST <sup>KD</sup> TCMEGAV <sup>Y</sup> E-----RVKRSV <sup>R</sup> FG <sup>R</sup> ALA-                  |  | 60.0%             |
|                   | *:::* . . *                                                                                                    |  | .                 |

| <b>ID</b>         | <b>Function</b>  | <b>Organism</b>            |
|-------------------|------------------|----------------------------|
| M7WKQ1            | LPMO9            | Rhodospiridium toruloides  |
| A0A061BI40        | LPMO9            | Rhodospiridium toruloides  |
| G0SWB0            | LPMO9            | Rhodospiridium toruloides  |
| A0A0K3CDZ6        | LPMO9            | Rhodospiridium toruloides  |
| A0A0D7AYH5        | LPMO9            | Cylindrobasidium torrendii |
| A0A0D7BPW0        | LPMO9            | Cylindrobasidium torrendii |
| <b>GtLPMO9A-2</b> | LPMO9            | Gloeophyllum trabeum       |
| A0A0D7AX18        | LPMO10-Chitin-bd | Cylindrobasidium torrendii |
| D8PQJ8            | LPMO9            | Schizophyllum commune      |
| D8QGA8            | LPMO9            | Schizophyllum commune      |
| A0A0D7BLY4        | LPMO9            | Cylindrobasidium torrendii |
| A0A0D7BKR1        | GH131            | Cylindrobasidium torrendii |
| D8PXB3            | putative GH131   | Schizophyllum commune      |
| R7RYA1            | LPMO9            | Stereum hirsutum           |

54

55 **Figure S3. Multiple sequence alignment of the C-terminal domain of GtLPMO9A-2 with**

56 **homologous domains. This domain seems to contain four conserved cysteines (grey triangles),**

57 three conserved aromatic residues (green diamonds), and a motif that is rich in positively  
58 charged amino acids. Aromatic amino acids (F, W, Y) are colored in green; positively charged  
59 amino acids (R, K) are colored in blue; negatively charged amino acids (D, E) are colored in red.  
60 The consensus symbols are indicated for the alignment excluding R7RYA1.  
61



70 Section 3. Purification of GtLPMO9A-2 (Fig. S5).

71

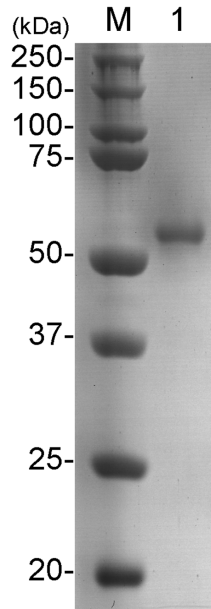

72

73 **Figure S5. SDS-PAGE of recombinant GtLPMO9A-2 produced in *Pichia pastoris*.** Lane M,

74 standard; Lane 1, purified recombinant GtLPMO9A-2 treated with EndoH.

75

76



77 Section 4. Activity of GtLPMO9A-2 (Figs. S6-11).

78

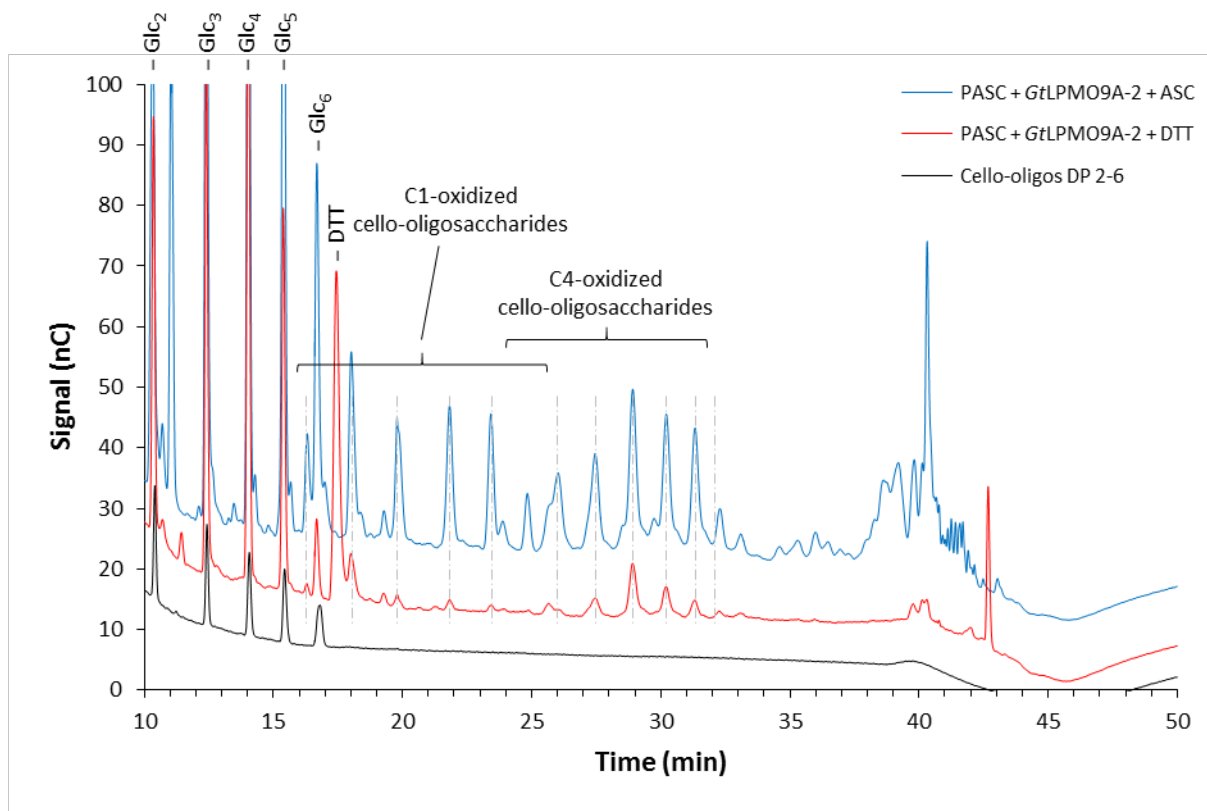

79

80 **Figure S6. Comparison of the product profile of GtLPMO9A-2 on PASC with ascorbic acid (ASC)**

81 **or DTT as electron donor.** The figure shows HPAEC-PAD chromatograms with cello-

82 oligosaccharides released by GtLPMO9A-2 from PASC; the peaks were assigned as in Fig. 3A.

83 Grey dashed lines indicate oxidized oligosaccharides. The reaction conditions were as in Fig. 3.

84

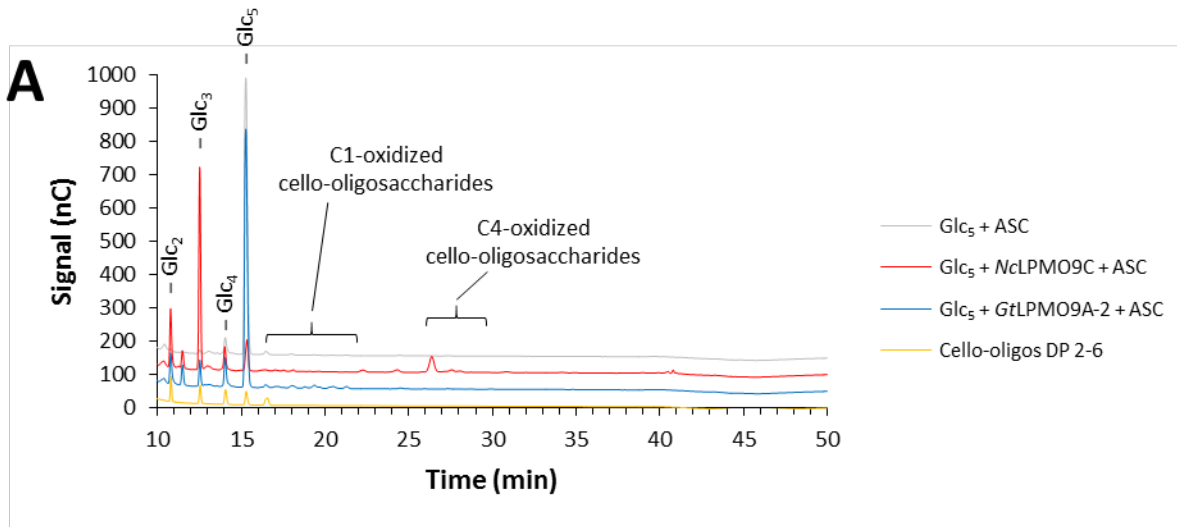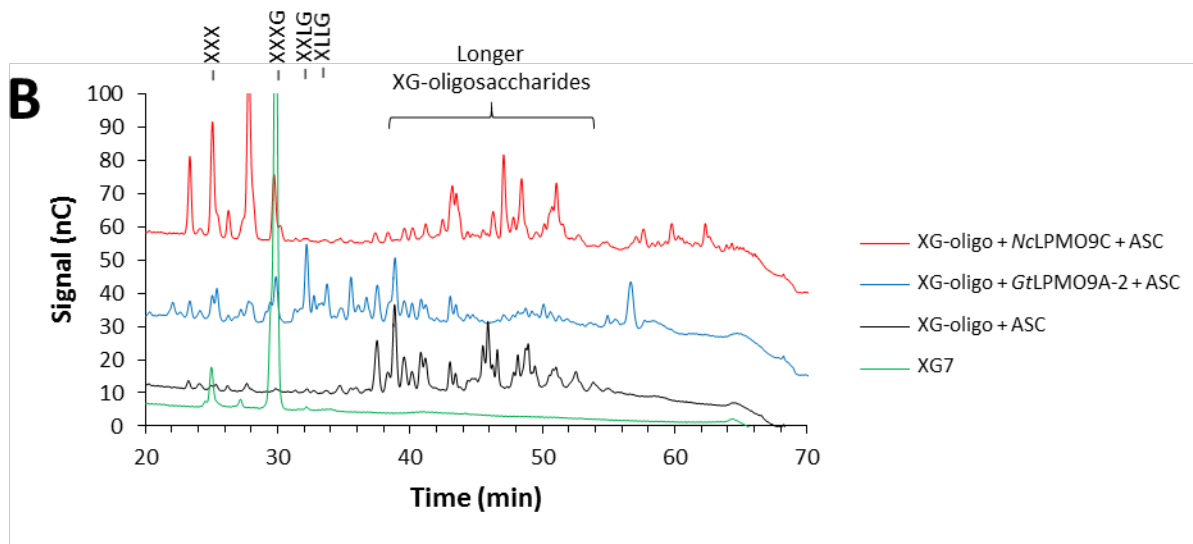

85

86 **Figure S7. Products generated by *GtLPMO9A-2* or *NcLPMO9C* from oligosaccharides.** The

87 figures show HPAEC-PAD chromatograms with peaks reflecting oligosaccharides released by

88 *GtLPMO9A-2* (blue) or *NcLPMO9C* (red) from cellopentaose **(A)** and xyloglucan oligosaccharides

89 **(B)**. Peaks were assigned based on previous assignments by Isaksen et al. (2) and Agger et al. (3).

90 Native cello-oligosaccharides are labeled as  $\text{Glc}_n$  where  $n$  is the degree of polymerization;

91 xyloglucan oligosaccharides are labeled according to the nomenclature proposed by York et al.

92 (4): X, glucose with xylose substitution; L, X with additional galactose substitution. Note that

93 *NcLPMO9C* is able to cleave cellopentaose (2), as is indeed visible in panel A.

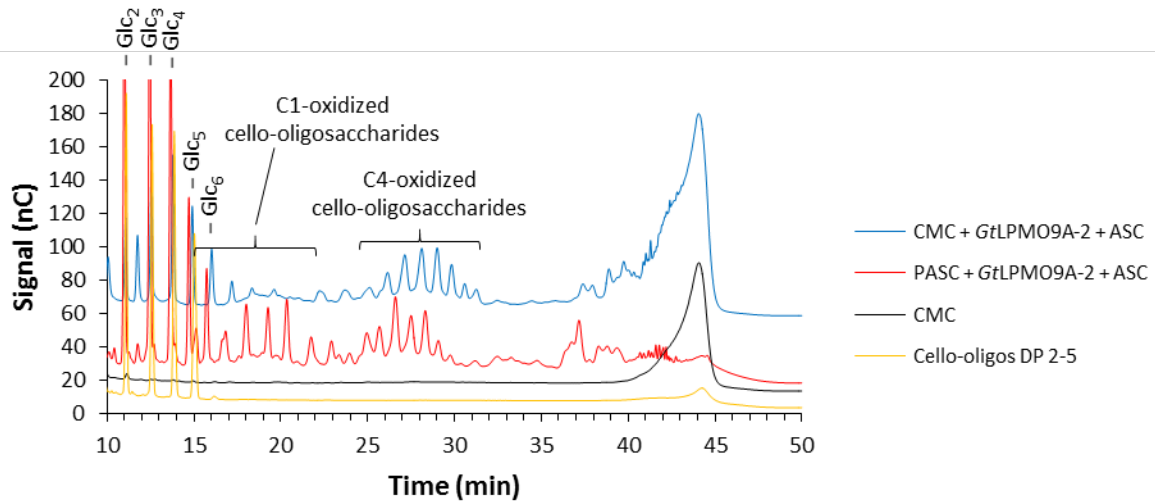

94

95 **Figure S8. Products generated by *GtLPMO9A-2* or *NcLPMO9C* from carboxymethylcellulose.**

96 HPAEC-PAD chromatograms showing oligosaccharides released by *GtLPMO9A-2* from CMC

97 (blue) and PASC (red). Native cello-oligosaccharides with DP 2-5 (orange) were used as a

98 standard.

99

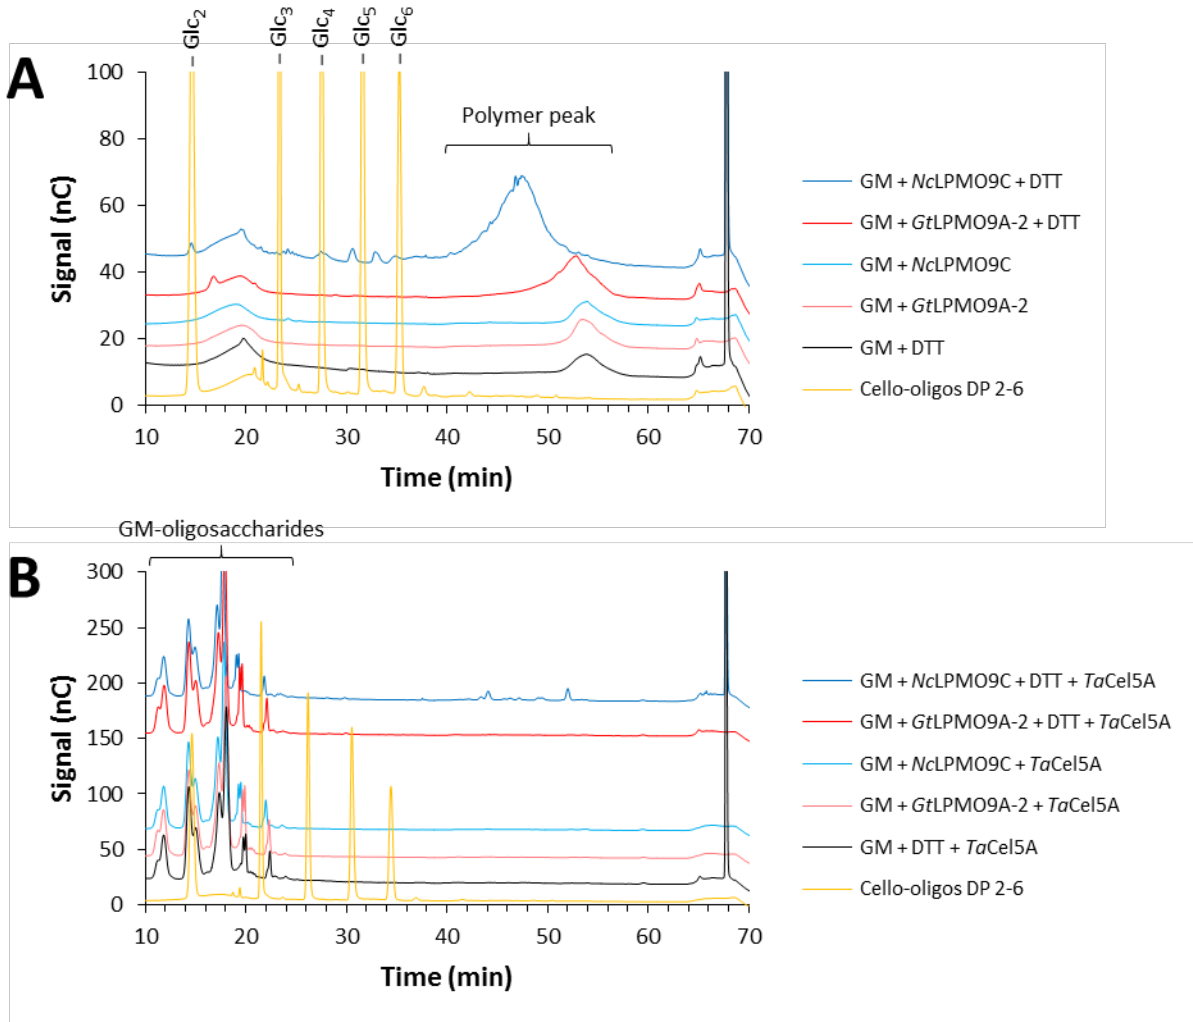

100

101 **Figure S9.** HPAEC-PAD analysis of reaction products generated from konjac glucomannan (GM)  
 102 by *GtLPMO9A-2* or *NcLPMO9C* in the dynamic viscosity experiments. Samples were taken after  
 103 16 hours of incubation and the chromatograms show the product profiles before **(A)** and after  
 104 **(B)** a subsequent treatment with *TaCel5A*. Orange line: native cello-oligosaccharides with DP 2-  
 105 6. Black line: GM incubated with DTT only. Red lines: products generated from GM by  
 106 *GtLPMO9A-2* in the presence (dark red) or absence (light red) of DTT. Blue lines: products  
 107 generated by *NcLPMO9C* in the presence (dark blue) or absence (light blue) of DTT; the small  
 108 peaks between 40 and 55 minutes visible in panel B for the reaction with *NcLPMO9C* are likely

109 to be oxidized GM fragments. The reaction conditions are specified in the Materials and  
110 Methods section. Note that the chromatograms are identically scaled and that we thus observe  
111 an increase in the polymer detector signal upon partial depolymerization (panel A).  
112

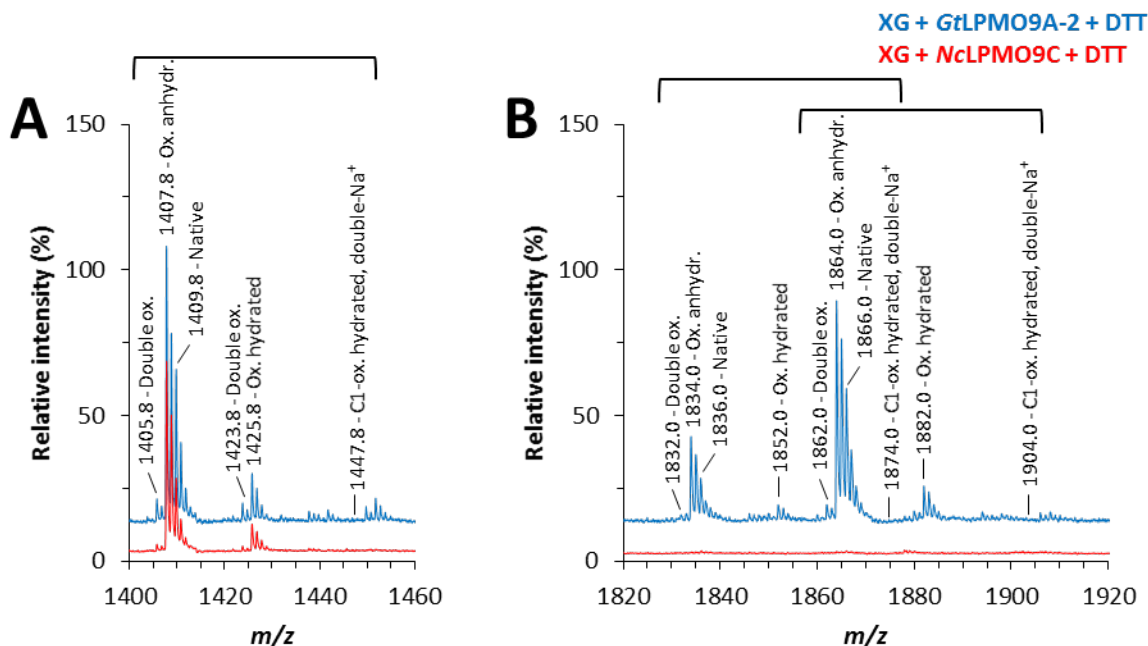

113  
 114 **Figure S10.** Details of the **(A)** Hex<sub>6</sub>Pen<sub>3</sub> and **(B)** Hex<sub>7</sub>Pen<sub>5</sub>/Hex<sub>8</sub>Pen<sub>4</sub> ion clusters in the MALDI-  
 115 ToF spectrum for the end-point sample from the dynamic viscosity analysis where GtLPMO9A-2  
 116 (blue lines) or NcLPMO9C (red lines) reacted with tamarind xyloglucan (XG) in the presence of  
 117 reducing agent (DTT). The clusters are marked with brackets; possible products in these clusters  
 118 are the native ( $m/z$  1409.8, 1836.0, and 1866.0), the C1-oxidized lactone or C4-oxidized  
 119 ketoaldose (anhydrated species,  $m/z$  1407.8, 1834.0, and 1864.0) and the C1-oxidized aldonic  
 120 acid or C4-oxidized gemdiol (hydrated species,  $m/z$  1425.8, 1852.0, and 1882.0). Signals  
 121 corresponding to the double-oxidized species ( $m/z$  1405.8, 1423.8, 1832.0, 1862.0) were very  
 122 low, and signals corresponding to the sodium adduct of the aldonic acid sodium salt ( $m/z$   
 123 1447.8, 1874.0, and 1904.0) could not be detected; the positions of these weak/absent signals  
 124 are indicated.

125

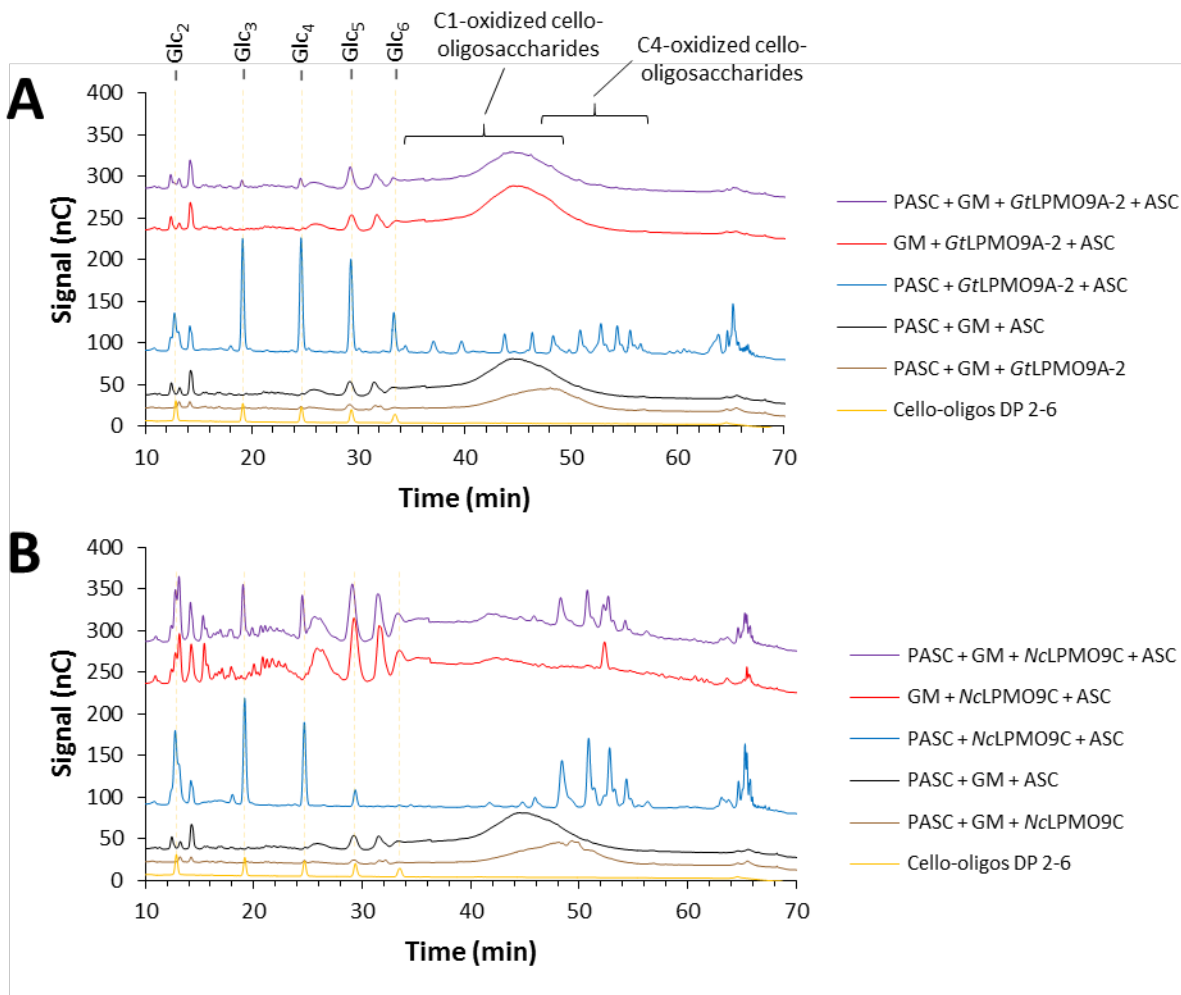

126

127 **Figure S11.** HPAEC-PAD analysis of reaction products generated by **(A)** *GtLPMO9A-2* or **(B)**

128 *NcLPMO9C* on glucomannan-coated PASC. Yellow line: native cello-oligosaccharides with DP 2-6.

129 Brown line: mixture of PASC and konjac glucomannan (GM) incubated with LPMO only. Black

130 line: mixture of PASC and GM incubated with ascorbic acid (ASC) only. Blue line: products

131 generated from PASC with LPMO in the presence of ASC. Red line: products generated from GM

132 with LPMO in the presence of ASC. Purple line: products generated from glucomannan-coated

133 PASC with LPMO in the presence of ASC. The reaction conditions are specified in the Materials

134 and Methods section.

## 135 References

- 136 1. **Jagadeeswaran G, Gainey L, Prade R, Mort AJ.** 2016. A family of AA9 lytic  
137 polysaccharide monooxygenases in *Aspergillus nidulans* is differentially regulated by  
138 multiple substrates and at least one is active on cellulose and xyloglucan. *Appl Microbiol*  
139 *Biotechnol* **100**:4535-4547.
- 140 2. **Isaksen T, Westereng B, Aachmann FL, Agger JW, Kracher D, Kittl R, Ludwig R, Haltrich**  
141 **D, Eijsink VG, Horn SJ.** 2014. A C4-oxidizing lytic polysaccharide monooxygenase  
142 cleaving both cellulose and cello-oligosaccharides. *J Biol Chem* **289**:2632-2642.
- 143 3. **Agger JW, Isaksen T, Várnai A, Vidal-Melgosa S, Willats WGT, Ludwig R, Horn SJ, Eijsink**  
144 **VGH, Westereng B.** 2014. Discovery of LPMO activity on hemicelluloses shows the  
145 importance of oxidative processes in plant cell wall degradation. *Proc Natl Acad Sci U S A*  
146 **111**:6287-6292.
- 147 4. **York WS, van Halbeek H, Darvill AG, Albersheim P.** 1990. Structural analysis of  
148 xyloglucan oligosaccharides by <sup>1</sup>H-n.m.r. spectroscopy and fast-atom-bombardment  
149 mass spectrometry. *Carbohydr Res* **200**:9-31.

150
